# Supplementary material for: Validating and modeling the impact of high-frequency rapid antigen screening on COVID-19 spread and outcomes
Source: bioRxiv or medRxiv preprint supplement (doi:10.1101/2020.09.01.20184713), 2021-05-13
Supplement: Supplementary file [file 2020.09.01.20184713-1.pdf]

1 **Supplementary Materials**

2

3 **Results**

4 **Table S1. Data summary of direct antigen rapid test (DART) for detection of SARS-CoV-2**  
5 **nucleocapsid protein and DART for detection of SARS-CoV-2 spike glycoprotein**  
6 **performance in comparison to qRT-PCR results.**

7

8 **Table S2. Summary of results of COVID-19 outcomes in 3 US Regions and Brazil as a result**  
9 **of Frequent Rapid Testing Protocol using SIDHRE-Q Model.** Total Infected, Maximum  
10 Hospitalized, and Total Deaths are shown for Massachusetts, Los Angeles, New York, and São  
11 Jose do Rio Preto, Brazil under a qRT-PCR protocol (symptomatic testing) and a Rapid Testing  
12 protocol (once every three days with test performance of 80% sensitivity and 90% specificity).

13

14 **Table S3. Demographic and clinical summary of patients evaluated by the SARS-CoV-2**  
15 **Direct Antigen Rapid Test (DART).** N response, N or mean of positive, and % or standard  
16 deviation for each group is presented. All samples (n=131) collected and tested in São José do  
17 Rio Preto, Brazil.

18

19 **Figure S1. Graphical scheme displaying the relationships between the stages of quarantine**  
20 **and infection in *SIDHRE-Q* model: Q-U, quarantine uninfected; S, susceptible (uninfected); I,**  
21 **infected undetected (pre-testing and infected); D, infected detected (infection diagnosis through**  
22 **testing); H, hospitalized (infected with life threatening symptom progression); R, recovered**

23 (healed); **E**, extinct (dead); and **Q-R**, quarantine recovered (healed but in quarantine by false  
24 positive testing).

25

26 **Figure S2. COVID-19 Outcomes as a result of Frequent Rapid Testing Protocol with**  
27 **variable test performances using *SIDHRE-Q* Model.** The Cumulative Detected Infected,  
28 Hospitalized, Deceased, Active Infections, Recovered, and Quarantined are modeled over 105  
29 days (top to bottom) using reported data from 4 global regions: Massachusetts, Los Angeles,  
30 New York City, and São José do Rio Preto in Brazil (left to right). The COVID-19 population  
31 spread and outcomes are modeled under a Rapid Testing Protocol with variable testing  
32 frequencies ranging from 1-21 days between tests, and variable test performances: 90%  
33 specificity with 90% sensitivity (A), 70% sensitivity (B), 50% sensitivity (C), and 30%  
34 sensitivity (D); and 80% specificity with 90% sensitivity (E), 70% sensitivity (F), 50%  
35 sensitivity (G), and 30% sensitivity (H). This protocol is compared to a symptom-based Rapid  
36 Testing protocol and a symptom-based qRT-PCR protocol.

37

38 **Figure S3. Effect of Rapid Testing Protocol under variable testing sensitivities and**  
39 **increasing frequency under the *SIDHRE-Q* Model.** The Cumulative Infections, Maximum  
40 Simultaneously Hospitalized, and Deceased populations are modeled for Massachusetts, Los  
41 Angeles, New York City, and São José do Rio Preto in Brazil. The effect of increasing frequency  
42 of testing is modeled for various testing sensitivities (30%-90%) with an 80% specificity.

43

44 **Figure S4. Effect of County Based Rapid Testing strategy on COVID-19 outcomes in**  
45 **California.** This protocol varies testing frequency in accordance to the number of recorded

46 cases; the threshold for number of active infections which, if reached, signals to commence  
47 everyday testing, the highest frequency considered. A Rapid Test with a 80% sensitivity and  
48 90% sensitivity is used in this deployment strategy. Shown is the total cost per person per day  
49 versus the cumulative infections, maximum simultaneously hospitalized, and cumulative deaths  
50 with varied thresholds for all of CA is shown. The County Based Rapid Testing strategy is  
51 compared to uniform testing, which distributes the same number of total tests used in the county  
52 strategy, albeit evenly across each county. The effects of uniform testing are modeled for both a  
53 Rapid Testing protocol and a qRT-PCR protocol.

54

55 **Figure S5. Time series of the four fitted parameters  $\alpha$ ,  $\nu$ ,  $\mu$ , and  $\tau$  (left to right) for MA, LA,**  
56 **NYC, and SJRP (top to bottom).** See Table 2 in the Methods section for an explanation of the  
57 parameters. The values are extracted every seven days from data provided by the respective  
58 regions. The parameters vary significantly over time and location. Flat points occur during the  
59 seven day windows where the parameters are held constant. The fitting procedure is also outlined  
60 in the Methods section.

61

62

63 **Figure S6. Time series of the three fitted pieces of data Cumulative Cases, Daily**  
64 **Hospitalized, and Cumulative Deaths (left to right) for each county receiving testing in CA;**  
65 **Ventura (2A), Stanislaus (2B), Santa Clara (2C), San Joaquin (2D), San Francisco (2E), San**  
66 **Diego (2F), San Bernardino (2G), Sacramento (2H), Orange (2I), Los Angeles (2J), Kern (2K),**  
67 **Fresno (2L), Alameda (2M).** The counties included satisfy two requirements: population greater

68 than 1.5% of the total CA population and nonzero total number of deaths at each point in time.

69 The fitting procedure is outlined in the Methods section.

70

71

72

73

74

75

76

77

78

79

80

81

82

83

84

85

86

87

88

89

90



91 **Supplementary Tables**

92

93 **Table S1. Data summary of direct antigen rapid test (DART) for detection of SARS-CoV-2**  
94 **nucleocapsid protein and DART for detection of SARS-CoV-2 spike glycoprotein**  
95 **performance in comparison to qRT-PCR results.**

96

97

98

99

|                             | Cycle threshold (Ct) value | Total Cases | DART Positives | DART Negatives | Sensitivity | 95% Confidence Interval (semi-interval) | Specificity | 95% Confidence Interval (semi-interval) | Positive Predictive Value (PPV) | Negative Predictive Value (NPV) | Prevalence | Overall Agreement |
|-----------------------------|----------------------------|-------------|----------------|----------------|-------------|-----------------------------------------|-------------|-----------------------------------------|---------------------------------|---------------------------------|------------|-------------------|
| DART (nucleocapsid protein) | < 20                       | 114         | 24             | 90             | 95.8%       | 4.6%                                    | 91.1%       | 2.9%                                    | 74.2%                           | 98.8%                           | 21.1%      | 92.1%             |
|                             | < 25                       | 143         | 53             | 90             | 90.6%       | 3.9%                                    | 91.1%       | 2.9%                                    | 85.7%                           | 94.3%                           | 37.1%      | 90.9%             |
| SARS-CoV-2 (Gene Average)   | < 30                       | 168         | 78             | 90             | 83.3%       | 4.1%                                    | 91.1%       | 2.9%                                    | 89.0%                           | 86.3%                           | 46.4%      | 87.5%             |
|                             | < 35                       | 189         | 99             | 90             | 79.8%       | 3.9%                                    | 91.1%       | 2.9%                                    | 90.8%                           | 80.4%                           | 52.4%      | 85.2%             |
|                             | < 40                       | 190         | 100            | 90             | 80.0%       | 3.9%                                    | 91.1%       | 2.9%                                    | 90.9%                           | 80.4%                           | 52.6%      | 85.3%             |
| DART (spike glycoprotein)   | < 10                       | 51          | 2              | 49             | 100.0%      | 20.9%                                   | 85.7%       | 4.9%                                    | 22.2%                           | 98.9%                           | 3.9%       | 86.3%             |
|                             | < 15                       | 72          | 23             | 49             | 100.0%      | 2.8%                                    | 85.7%       | 4.9%                                    | 76.7%                           | 98.9%                           | 31.9%      | 90.3%             |
| SARS-CoV-2 (Gene Average)   | < 20                       | 90          | 41             | 49             | 97.6%       | 2.8%                                    | 85.7%       | 4.9%                                    | 85.1%                           | 96.6%                           | 45.6%      | 91.1%             |
|                             | < 25                       | 111         | 62             | 49             | 91.9%       | 3.4%                                    | 85.7%       | 4.9%                                    | 89.1%                           | 89.4%                           | 55.9%      | 89.2%             |
| DART (spike glycoprotein)   | < 30                       | 121         | 72             | 49             | 84.7%       | 4.1%                                    | 85.7%       | 4.9%                                    | 89.7%                           | 79.2%                           | 59.5%      | 85.1%             |
|                             | < 35                       | 121         | 72             | 49             | 84.7%       | 4.1%                                    | 85.7%       | 4.9%                                    | 89.7%                           | 79.2%                           | 59.5%      | 85.1%             |

101 **Table S2. Summary of results of COVID-19 outcomes in 3 US Regions and Brazil as a result**  
 102 **of Frequent Rapid Testing Protocol using SIDHRE-Q Model.** Total Infected, Maximum  
 103 Hospitalized, and Total Deaths are shown for Massachusetts, Los Angeles, New York, and São  
 104 Jose do Rio Preto, Brazil under a qRT-PCR protocol (symptomatic testing) and a Rapid Testing  
 105 protocol (once every three days with test performance of 80% sensitivity and 90% specificity).

106

|                         | Massachusetts |              | Los Angeles |              | New York City |              | São José do Rio Preto, Brazil |              |
|-------------------------|---------------|--------------|-------------|--------------|---------------|--------------|-------------------------------|--------------|
|                         | qRT-PCR       | 1 per 3 days | qRT-PCR     | 1 per 3 days | qRT-PCR       | 1 per 3 days | qRT-PCR                       | 1 per 3 days |
| <b>Total Infected</b>   | 18.40%        | 1.60%        | 11.70%      | 1.42%        | 26.40%        | 9.45%        | 11.70%                        | 0.186%       |
| <b>Max Hospitalized</b> | 0.056%        | 0.025%       | 0.028%      | 0.022%       | 0.144%        | 0.130%       | 0.054%                        | 0.003%       |
| <b>Total Deaths</b>     | 0.119%        | 0.029%       | 0.039%      | 0.009%       | 0.226%        | 0.157%       | 0.040%                        | 0.003%       |

107

108

109

110

111

112

113

114

115

116

117

118

119

120 **Table S3**

121 **Table S3. Demographic and clinical summary of patients evaluated by the SARS-CoV-2 Direct**  
 122 **Antigen Rapid Test (DART).** N response, N or mean of positive, and % or standard deviation for each  
 123 group is presented. All samples (n=131) collected and tested in São José do Rio Preto, Brazil.

124

|                                           | TOTAL      |                       |                         | COVID-19 positive |                       |                         | COVID-19 negative |                  |                         |
|-------------------------------------------|------------|-----------------------|-------------------------|-------------------|-----------------------|-------------------------|-------------------|------------------|-------------------------|
|                                           | N response | N or mean of positive | % or standard deviation | N response        | N or mean of positive | % or standard deviation | N response        | mean of positive | % or standard deviation |
| <b>Age</b>                                | 121        | 40.43                 | 17.17                   | 72                | 43.37                 | 12.58                   | 49                | 36.12            | 15.3                    |
| 0-14 yr                                   | 121        | 5                     | 4.1%                    | 72                | 2                     | 2.8%                    | 49                | 3                | 6.1%                    |
| 15-29 yr                                  | 121        | 30                    | 24.8%                   | 72                | 17                    | 23.6%                   | 49                | 13               | 26.5%                   |
| 30-59 yr                                  | 121        | 69                    | 57.0%                   | 72                | 39                    | 54.2%                   | 49                | 30               | 61.2%                   |
| ≥60 yr                                    | 121        | 17                    | 14.0%                   | 72                | 14                    | 19.4%                   | 49                | 3                | 6.1%                    |
| <b>Gender</b>                             |            |                       |                         |                   |                       |                         |                   |                  |                         |
| Female                                    | 121        | 75                    | 62.0%                   | 72                | 43                    | 59.7%                   | 49                | 32               | 65.3%                   |
| Male                                      | 121        | 46                    | 38.0%                   | 72                | 29                    | 40.3%                   | 49                | 17               | 34.7%                   |
| <b>Comorbidities</b>                      |            |                       |                         |                   |                       |                         |                   |                  |                         |
| Cardiovascular disease                    | 115        | 7                     | 6.1%                    | 71                | 6                     | 8.5%                    | 44                | 1                | 2.3%                    |
| Diabetes                                  | 115        | 9                     | 7.8%                    | 71                | 6                     | 8.5%                    | 44                | 3                | 6.8%                    |
| Asthma                                    | 115        | 1                     | 0.9%                    | 71                | 1                     | 1.4%                    | 44                | 0                | 0.0%                    |
| Pulmonary disease                         | 115        | 4                     | 3.5%                    | 71                | 1                     | 1.4%                    | 44                | 3                | 6.8%                    |
| Chronic Kidney disease (Stage III, IV, V) | 115        | 12                    | 10.4%                   | 71                | 1                     | 1.4%                    | 44                | 11               | 25.0%                   |
| Immunosuppression                         | 115        | 3                     | 2.6%                    | 71                | 1                     | 1.4%                    | 44                | 0                | 0.0%                    |
| Post pregnant                             | 115        | 2                     | 1.7%                    | 71                | 1                     | 1.4%                    | 44                | 1                | 2.3%                    |
| Neurologic Disease                        | 115        | 0                     | 0.0%                    | 71                | 0                     | 0.0%                    | 44                | 0                | 0.0%                    |
| Chromosomal disease                       | 115        | 0                     | 0.0%                    | 71                | 0                     | 0.0%                    | 44                | 0                | 0.0%                    |
| Hematological diseases                    | 115        | 0                     | 0.0%                    | 71                | 0                     | 0.0%                    | 44                | 0                | 0.0%                    |
| Liver disease                             | 115        | 0                     | 0.0%                    | 71                | 0                     | 0.0%                    | 44                | 0                | 0.0%                    |
| Obesity                                   | 115        | 0                     | 0.0%                    | 71                | 0                     | 0.0%                    | 44                | 0                | 0.0%                    |
| Hospitalization                           | 116        | 5                     | 4.3%                    | 71                | 5                     | 7.0%                    | 45                | 0                | 0.0%                    |
| Asymptomatic                              | 116        | 8                     | 6.9%                    | 71                | 6                     | 8.5%                    | 45                | 2                | 4.4%                    |
| <b>Initial symptoms</b>                   |            |                       |                         |                   |                       |                         |                   |                  |                         |
| Fever                                     | 116        | 40                    | 34.5%                   | 71                | 32                    | 45.1%                   | 45                | 8                | 17.8%                   |
| Cough                                     | 116        | 66                    | 56.9%                   | 71                | 42                    | 59.2%                   | 45                | 24               | 53.3%                   |
| Sore throat                               | 116        | 47                    | 40.5%                   | 71                | 22                    | 31.0%                   | 45                | 25               | 55.6%                   |
| Dyspnea                                   | 116        | 25                    | 21.6%                   | 71                | 17                    | 23.9%                   | 45                | 8                | 17.8%                   |
| Low Saturation                            | 116        | 4                     | 3.5%                    | 71                | 4                     | 5.7%                    | 45                | 0                | 0.0%                    |
| Diarrhea                                  | 116        | 4                     | 3.5%                    | 71                | 4                     | 5.7%                    | 45                | 0                | 0.0%                    |
| Vomit                                     | 116        | 3                     | 2.6%                    | 71                | 2                     | 2.9%                    | 45                | 1                | 2.2%                    |
| Headache                                  | 116        | 43                    | 37.4%                   | 71                | 28                    | 40.0%                   | 45                | 15               | 33.3%                   |
| Days of fever/symptoms                    | 120        | 3.23                  | 2.64                    | 71                | 3.29                  | 2.46                    | 49                | 3.14             | 2.9                     |

125

126

127

128

129

130

131 **Supplementary Figures**

132 **Figure S1**

133 **Figure S1. Graphical scheme displaying the relationships between the stages of quarantine and**  
 134 **infection in *SIDHRE-Q* model: Q-U, quarantine uninfected; S, susceptible (uninfected); I, infected**  
 135 **undetected (pre-testing and infected); D, infected detected (infection diagnosis through testing); H,**  
 136 **hospitalized (infected with life threatening symptom progression); R, recovered (healed); E, extinct**  
 137 **(dead); and Q-R, quarantine recovered (healed but in quarantine by false positive testing).**

138

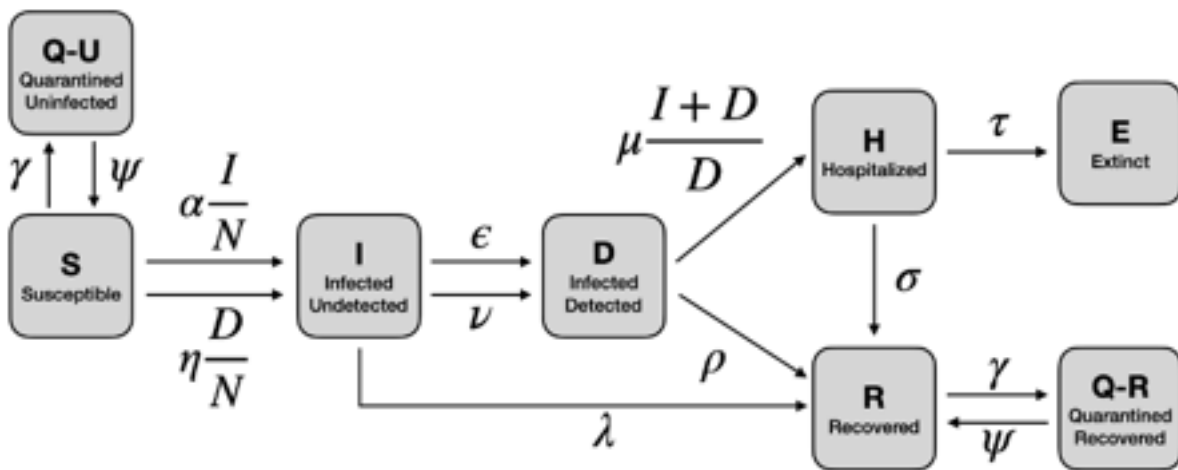

139

140

141

142

143

144

145

146

147

148

149 **Figure S2**

150 **Figure S2. COVID-19 Outcomes as a result of Frequent Rapid Testing Protocol with variable test**  
151 **performances using *SIDHRE-Q* Model.** The Cumulative Detected Infected, Hospitalized, Deceased,  
152 Active Infections, Recovered, and Quarantined are modeled over 105 days (top to bottom) using reported  
153 data from 4 global regions: Massachusetts, Los Angeles, New York City, and São José do Rio Preto in  
154 Brazil (left to right). The COVID-19 population spread and outcomes are modeled under a Rapid Testing  
155 Protocol with variable testing frequencies ranging from 1-21 days between tests, and variable test  
156 performances: 90% specificity with 90% sensitivity (A), 70% sensitivity (B), 50% sensitivity (C), and  
157 30% sensitivity (D); and 80% specificity with 90% sensitivity (E), 70% sensitivity (F), 50% sensitivity  
158 (G), and 30% sensitivity (H). This protocol is compared to a symptom-based Rapid Testing protocol and  
159 a symptom-based qRT-PCR protocol.

160

161

162

163

164

165

166

167

168

169

170

171

172

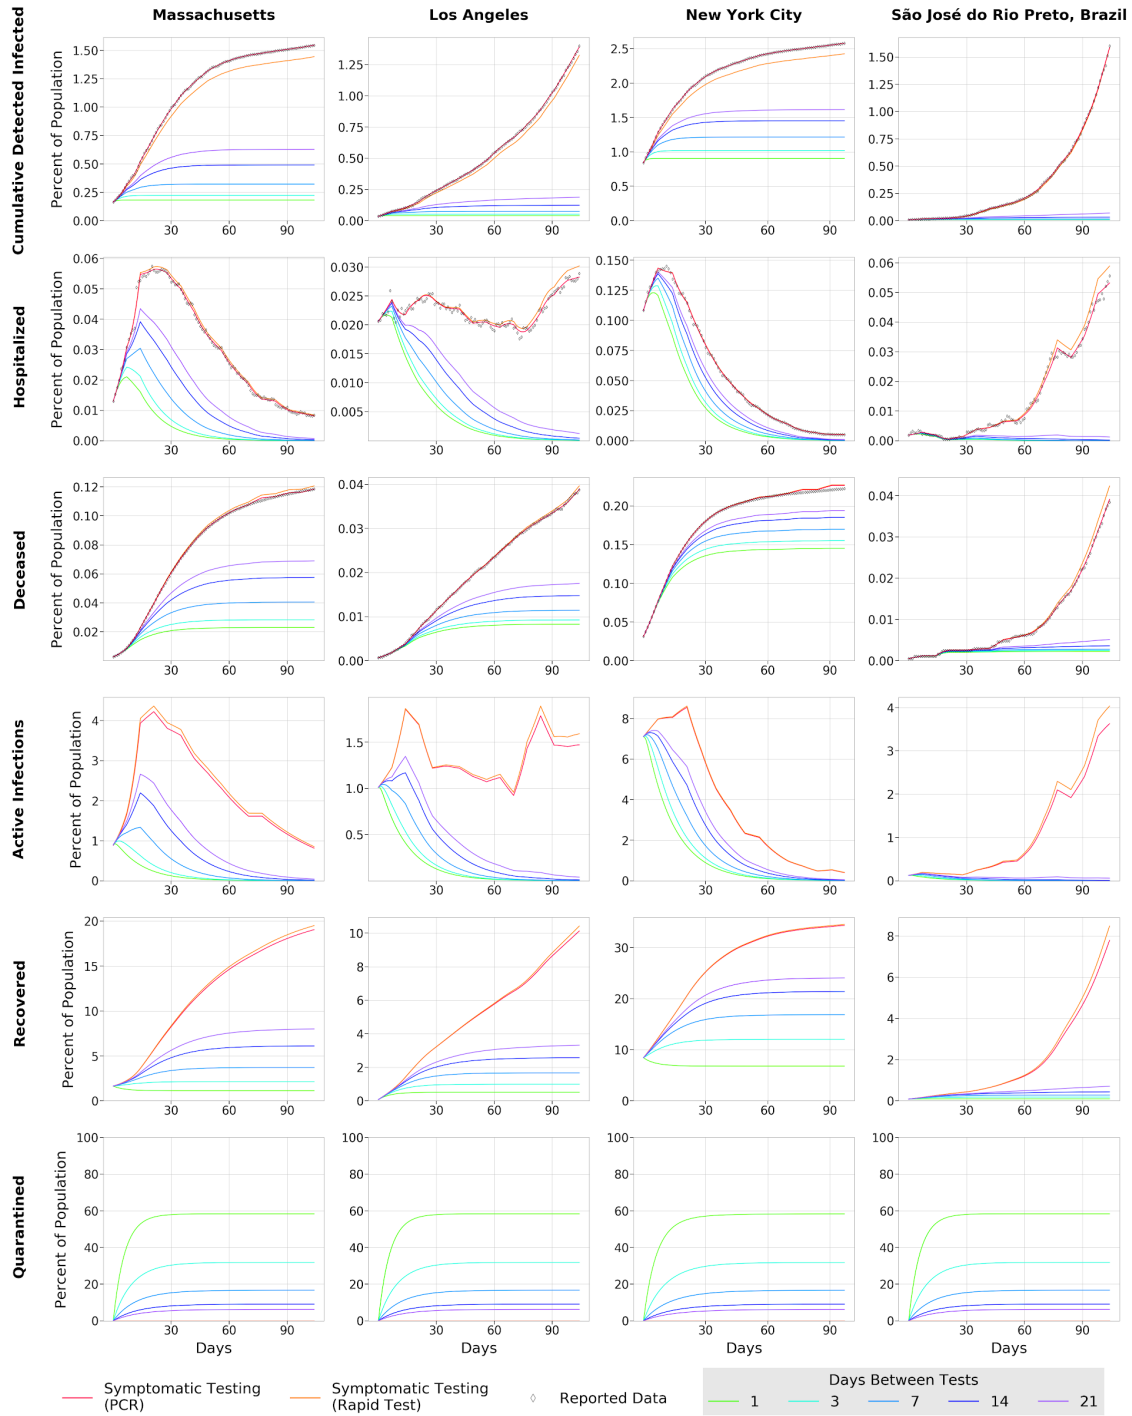

— Symptomatic Testing (PCR)    — Symptomatic Testing (Rapid Test)    ◊ Reported Data    Days Between Tests: 1, 3, 7, 14, 21

Sensitivity: 90.0% Specificity: 90.0%

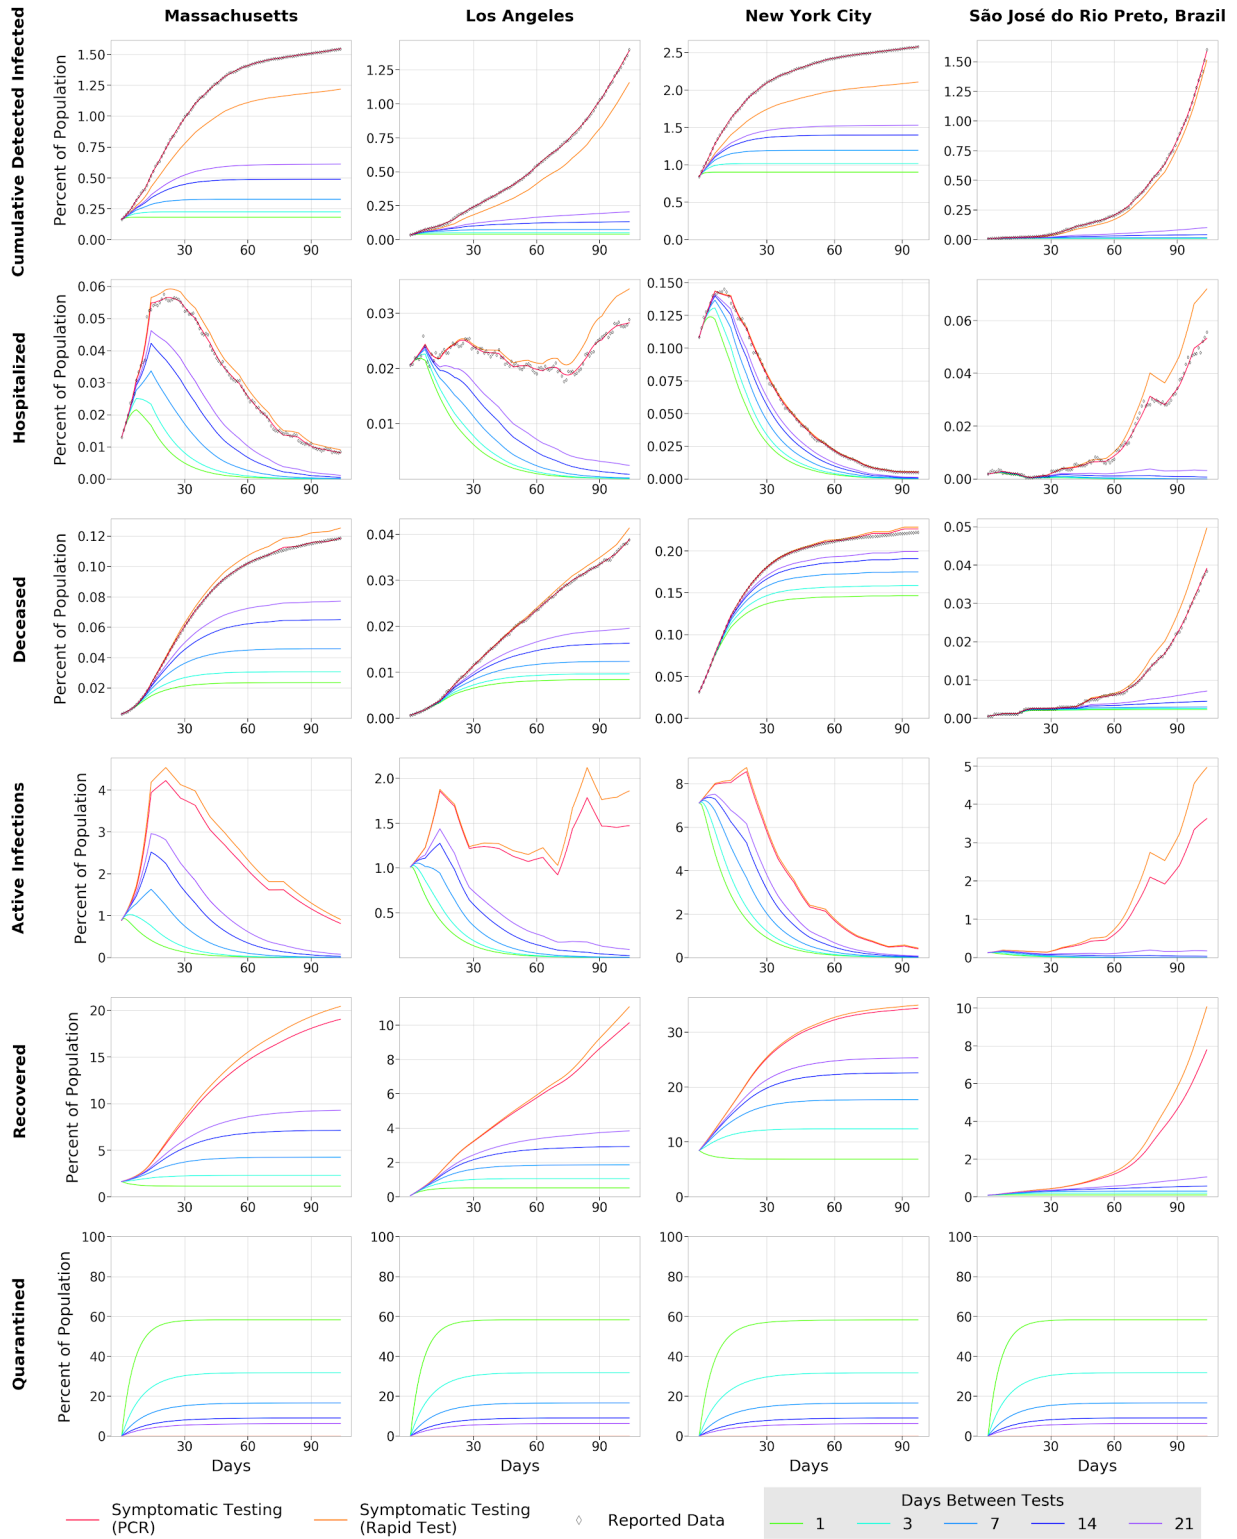



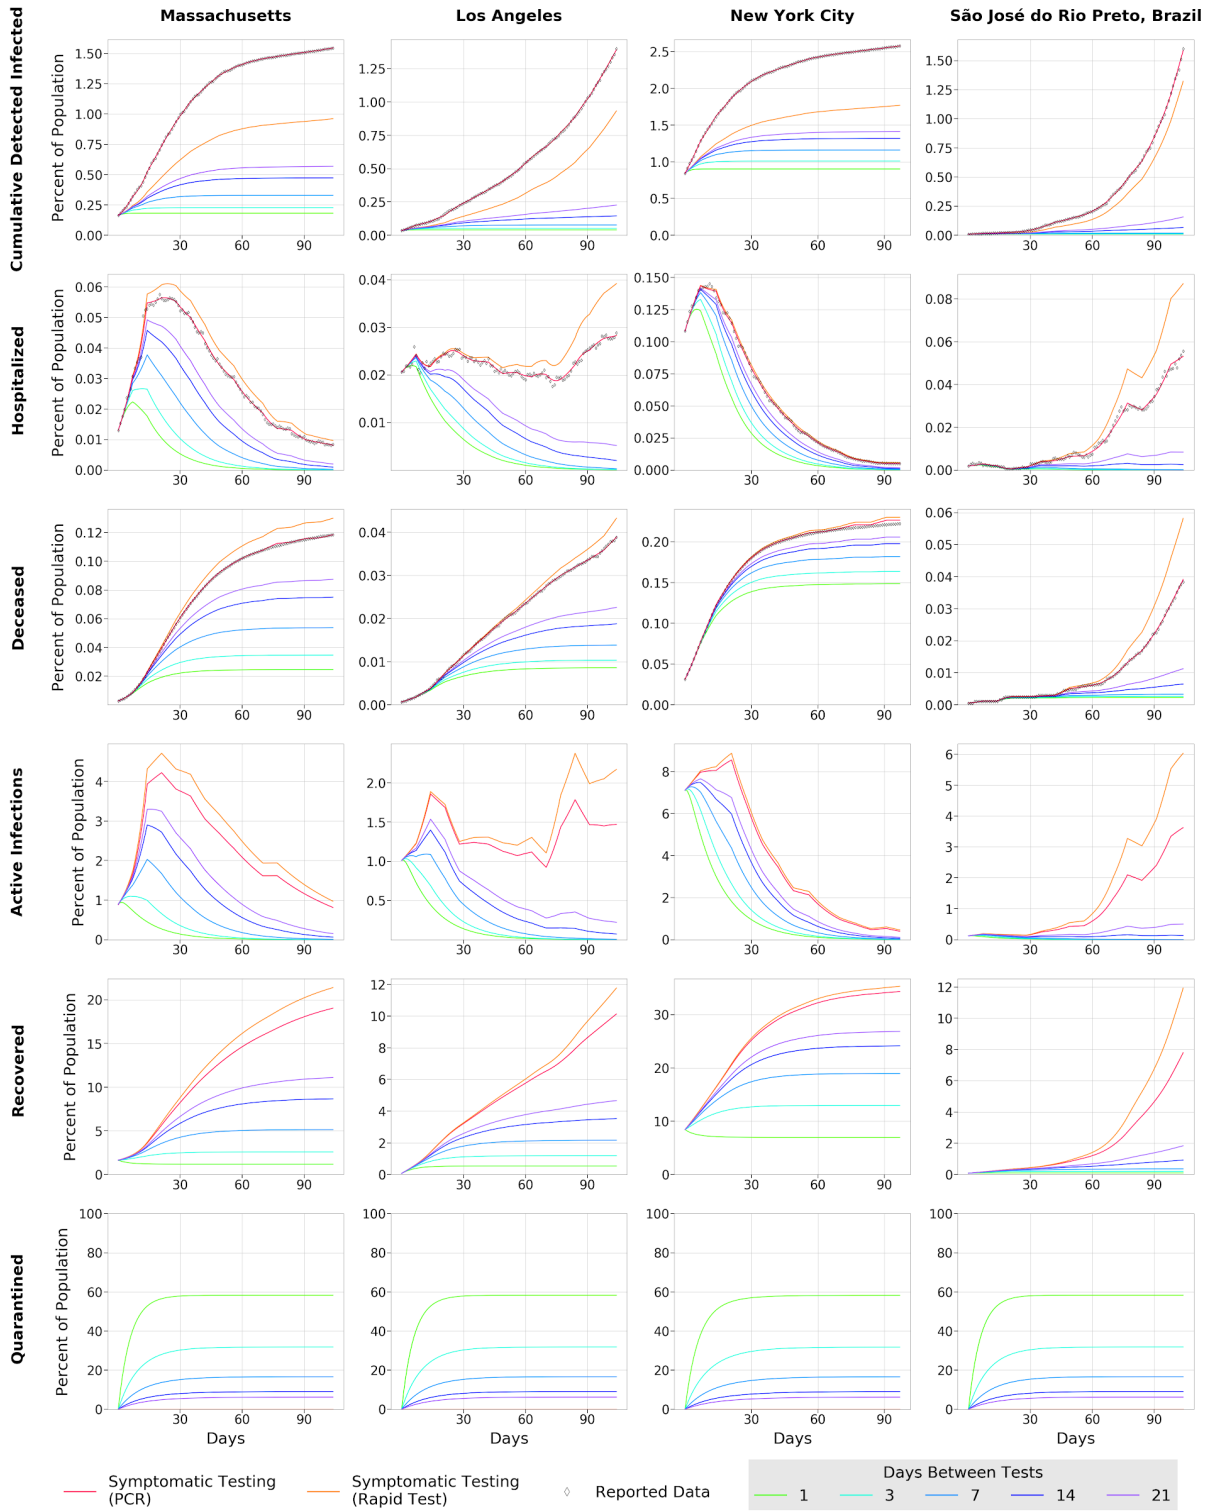

Sensitivity: 50.0% Specificity: 90.0%

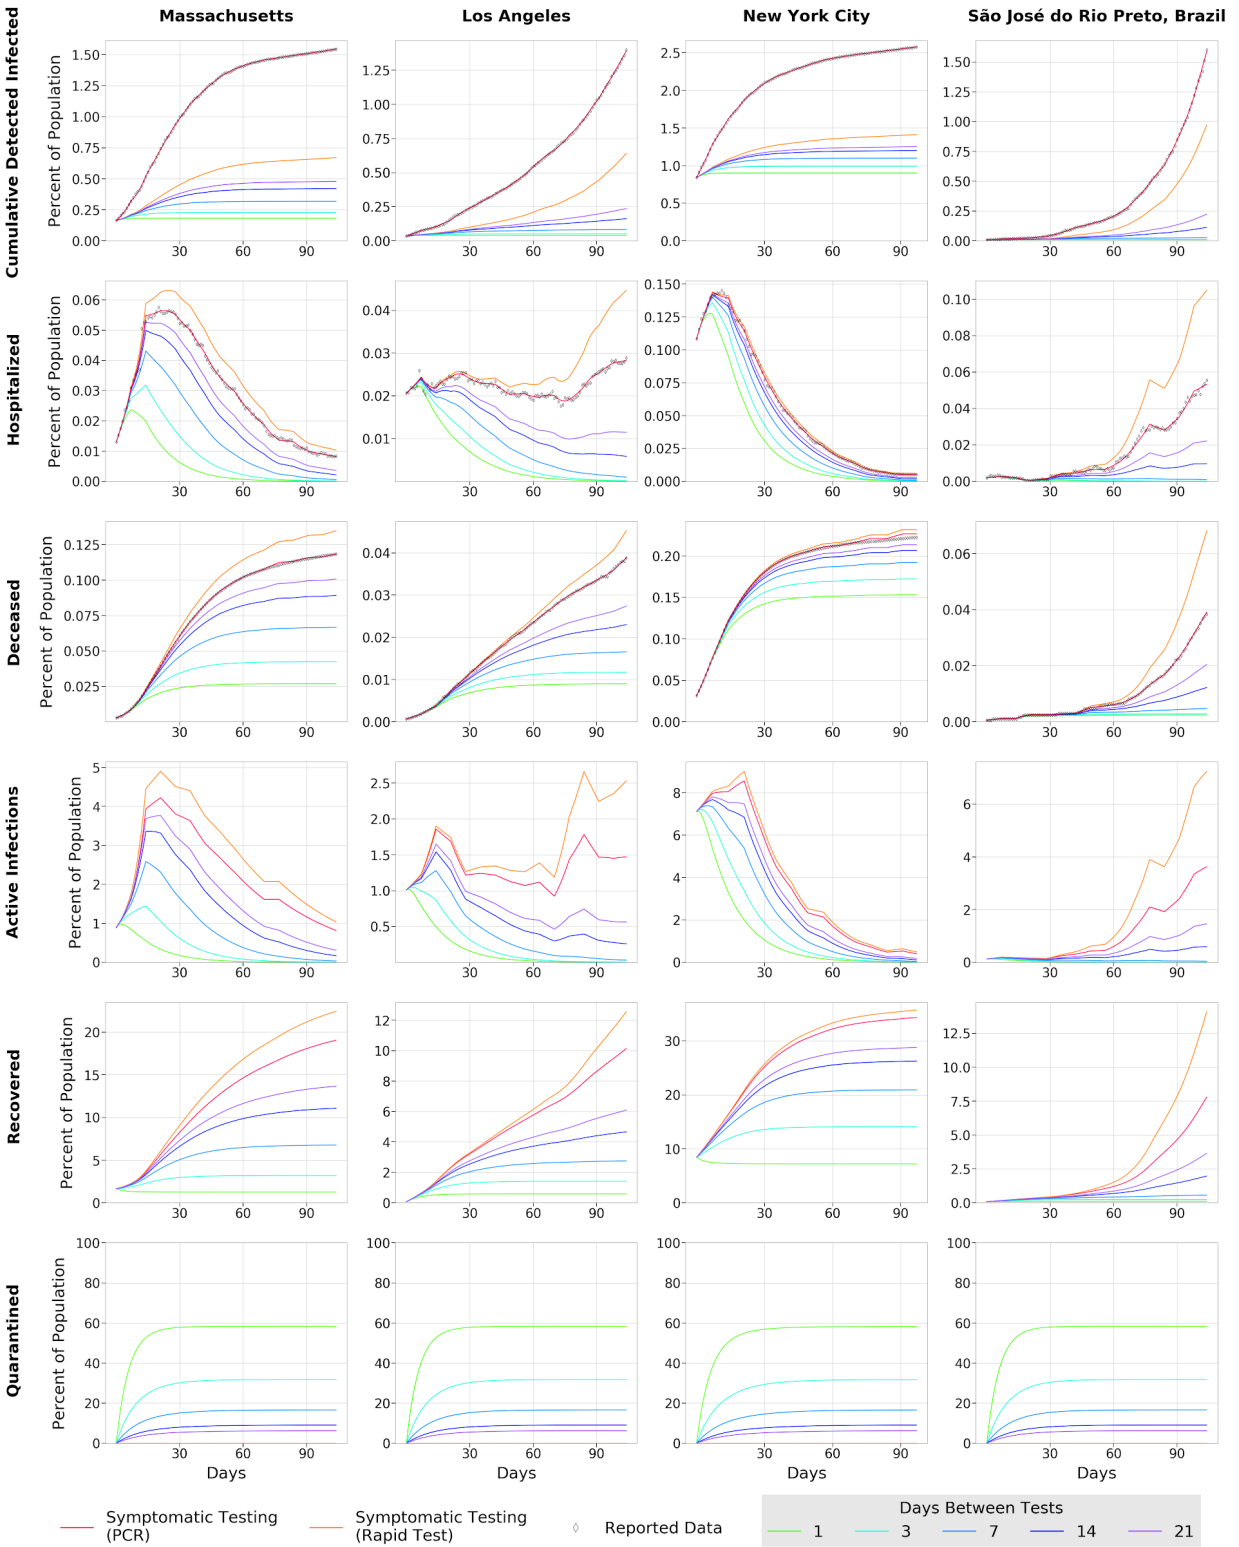

Sensitivity: 30.0% Specificity: 90.0%

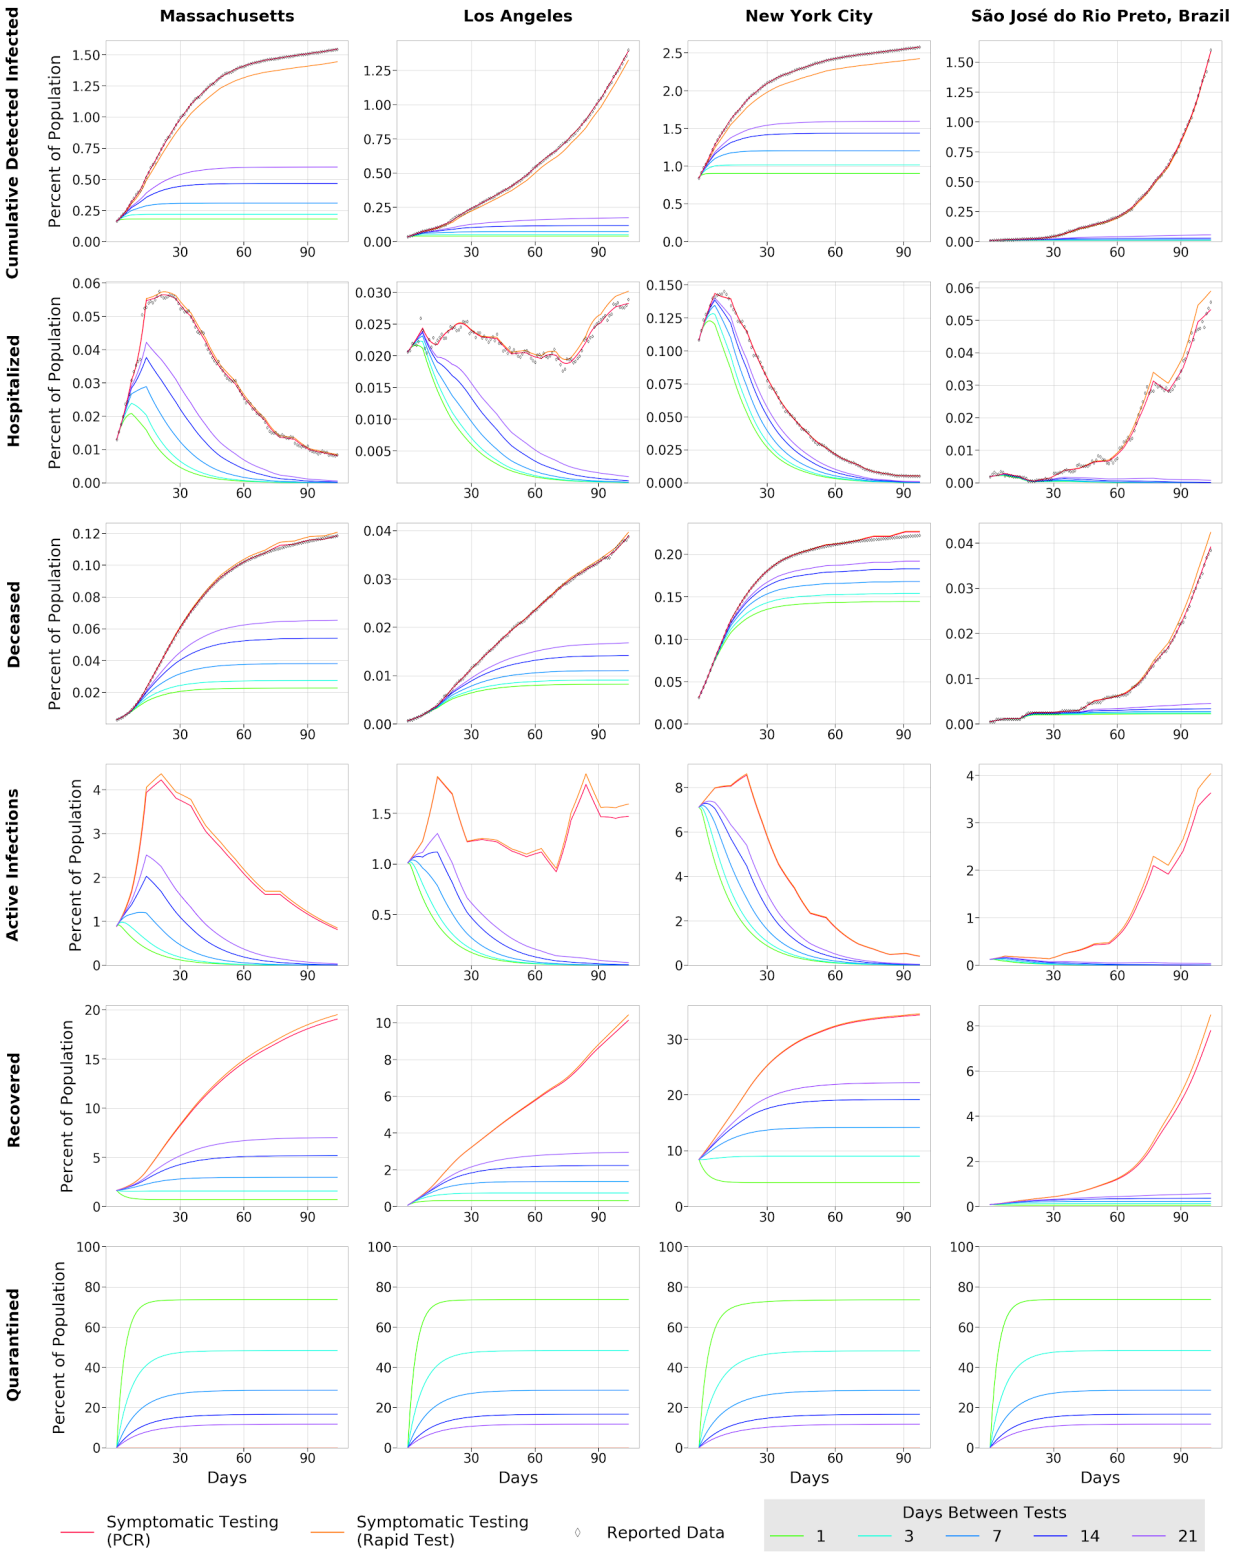

Sensitivity: 90.0% Specificity: 80.0%

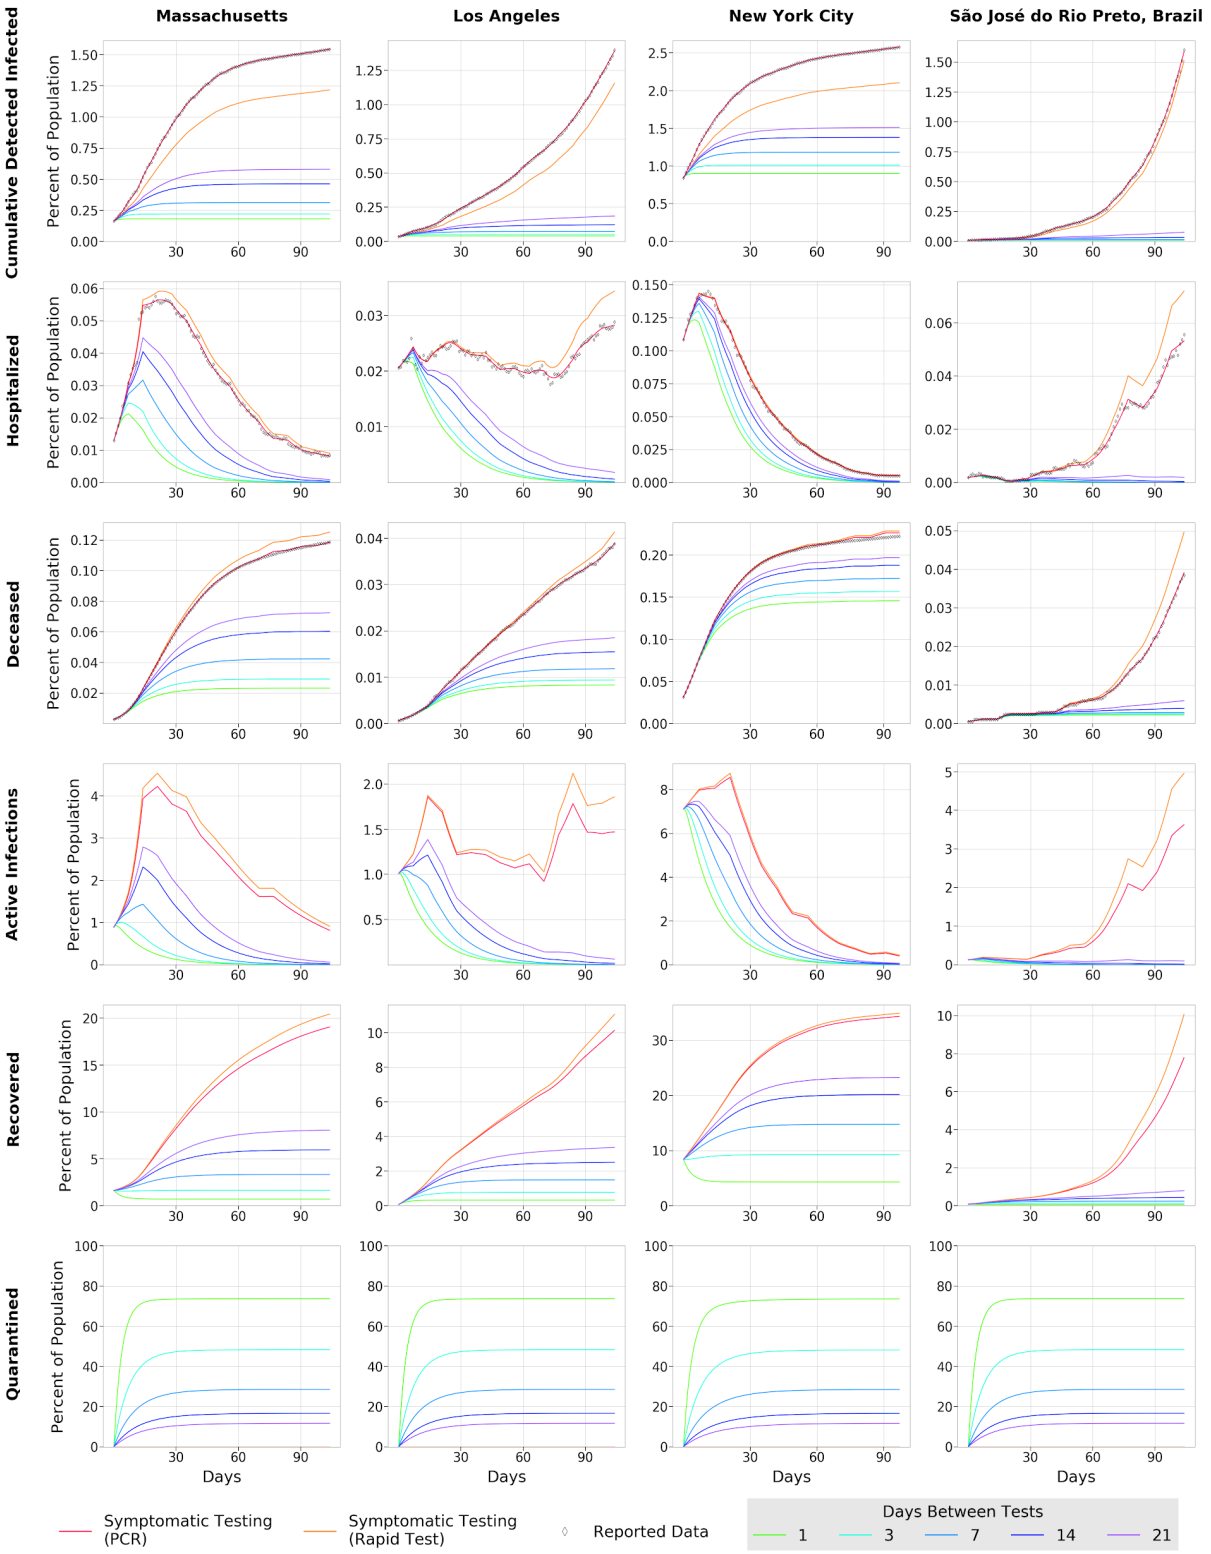

— Symptomatic Testing (PCR)    — Symptomatic Testing (Rapid Test)    ◇ Reported Data    Days Between Tests: 1 (green), 3 (cyan), 7 (blue), 14 (purple), 21 (dark purple)

Sensitivity: 70.0% Specificity: 80.0%

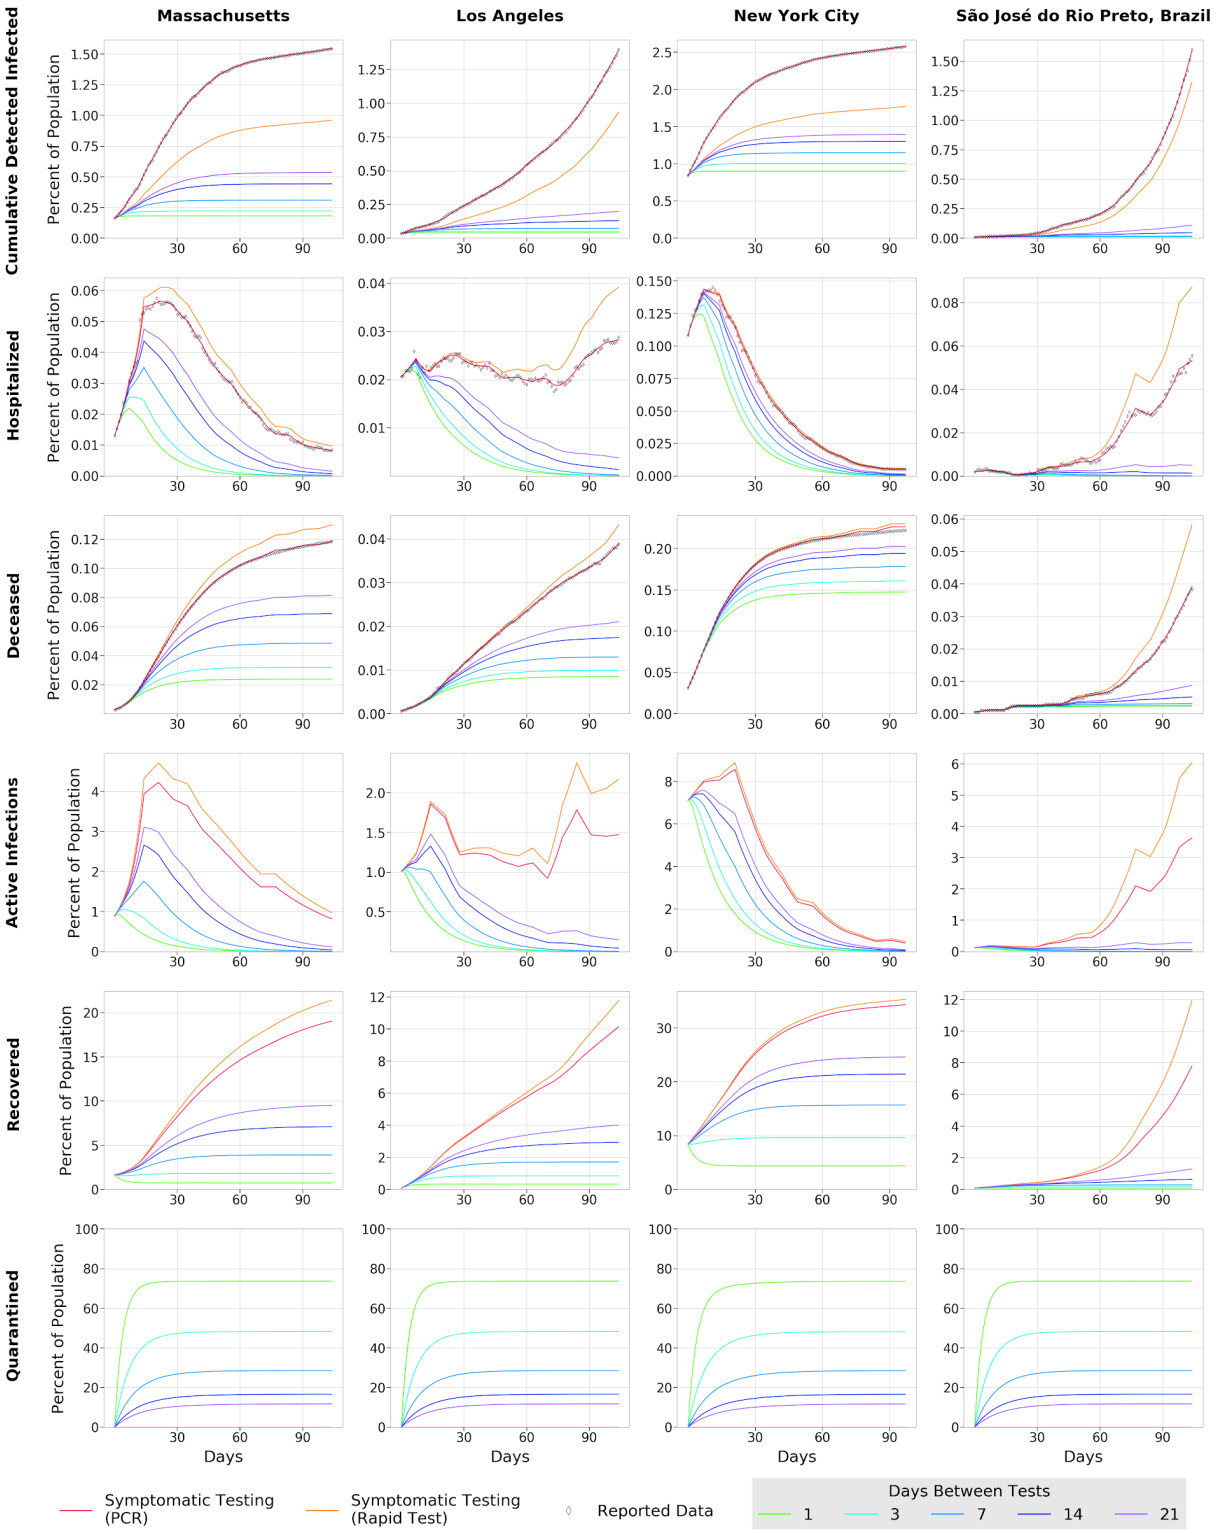

— Symptomatic Testing (PCR)    — Symptomatic Testing (Rapid Test)    ◇ Reported Data    Days Between Tests: 1, 3, 7, 14, 21

Sensitivity: 50.0% Specificity: 80.0%

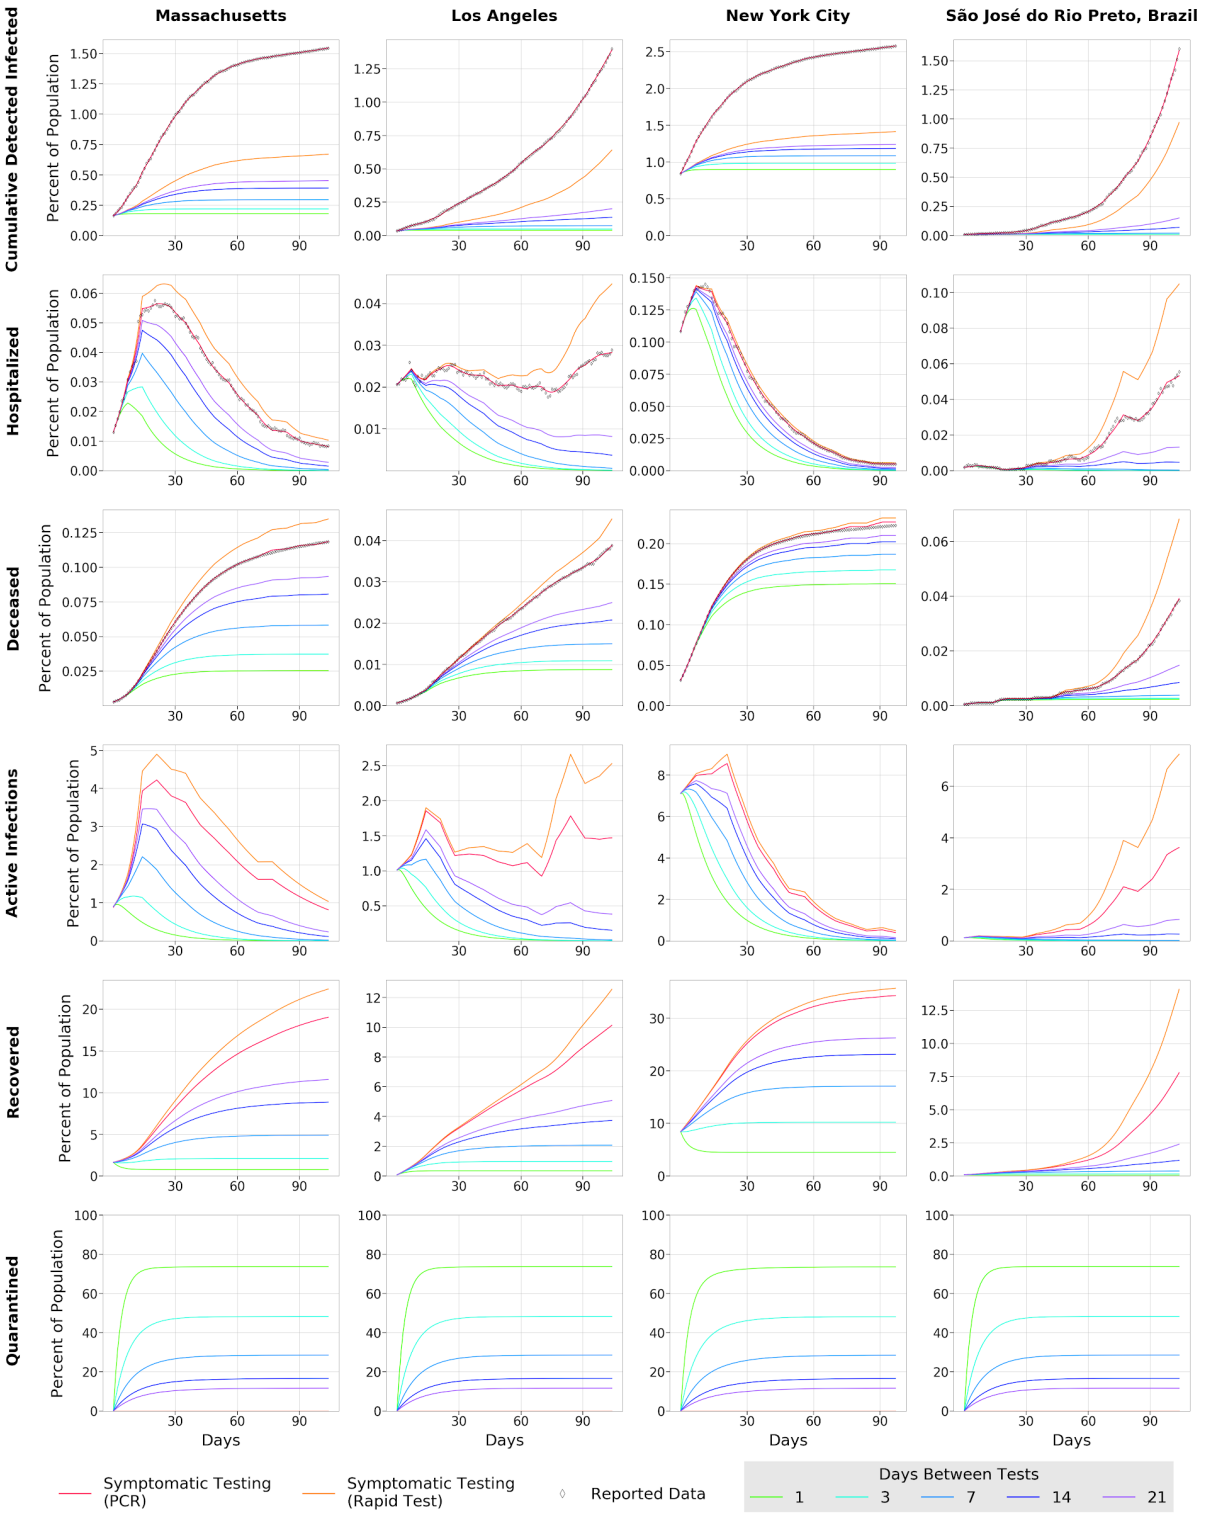

— Symptomatic Testing (PCR)   
 — Symptomatic Testing (Rapid Test)   
 ◊ Reported Data   
 Days Between Tests:
   
— 1   
 — 3   
 — 7   
 — 14   
 — 21

Sensitivity: 30.0% Specificity: 80.0%

190 **Figure S3**

191 **Figure S3. Effect of Rapid Testing Protocol under variable testing sensitivities and increasing**  
192 **frequency under the *SIDHRE-Q* Model.** The Cumulative Infections, Maximum Simultaneously  
193 Hospitalized, and Deceased populations are modeled for Massachusetts, Los Angeles, New York City,  
194 and São José do Rio Preto in Brazil. The effect of increasing frequency of testing is modeled for various  
195 testing sensitivities (30%-90%) with an 80% specificity.

196

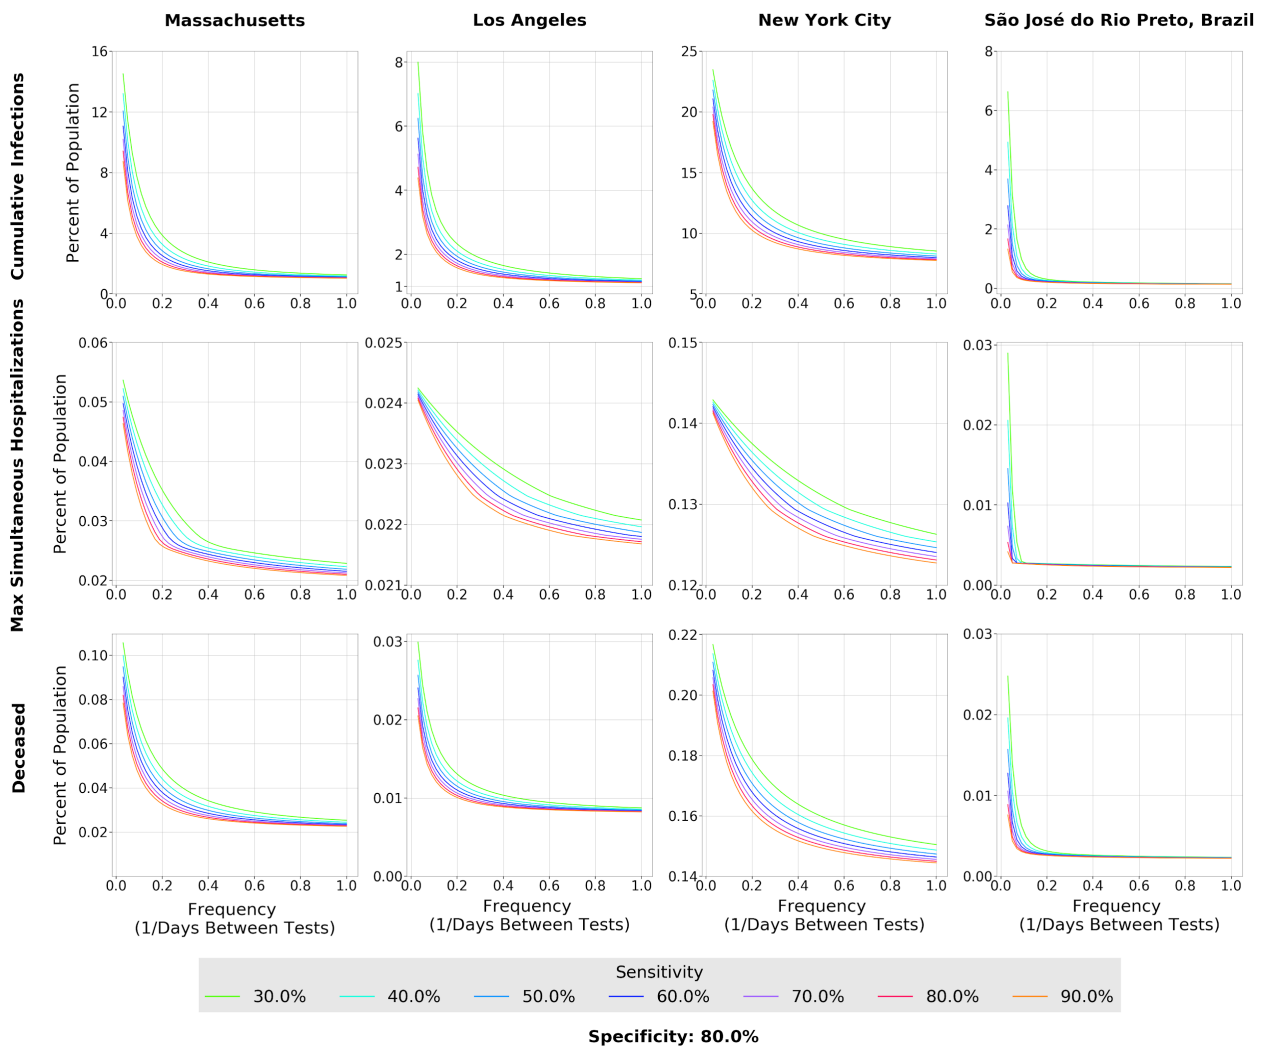

197

198

199

200 **Figure S4**

201 **Figure S4. Effect of County Based Rapid Testing strategy on COVID-19 outcomes in California.**

202 This protocol varies testing frequency in accordance to the number of recorded cases; the threshold for  
203 number of active infections which, if reached, signals to commence everyday testing, the highest  
204 frequency considered. A Rapid Test with a 80% sensitivity and 90% sensitivity is used in this deployment  
205 strategy. Shown is the total cost per person per day versus the cumulative infections, maximum  
206 simultaneously hospitalized, and cumulative deaths with varied thresholds for all of CA is shown. The  
207 County Based Rapid Testing strategy is compared to uniform testing, which distributes the same number  
208 of total tests used in the county strategy, albeit evenly across each county. The effects of uniform testing  
209 are modeled for both a Rapid Testing protocol and a qRT-PCR protocol.  
210

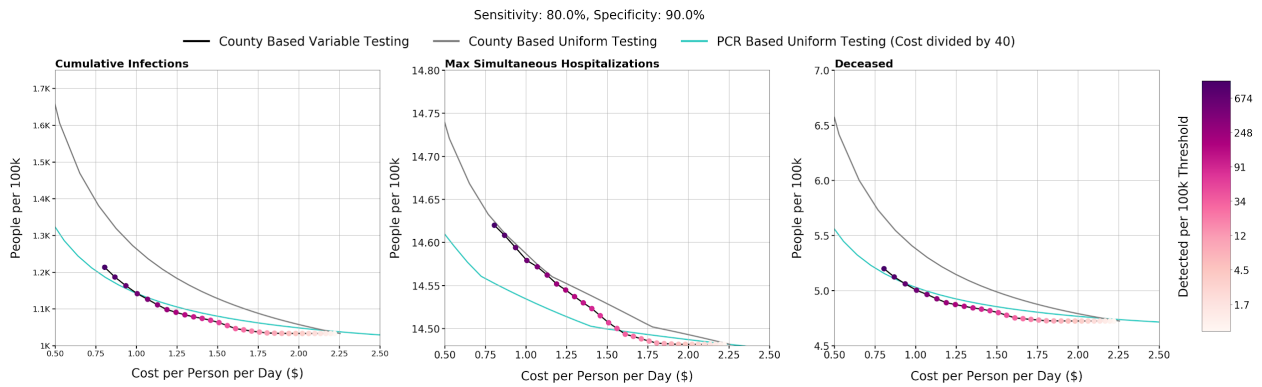

211

212

213

214

215

216

217

218

219



220 **Figure S5**

221 **Figure S5.** Time series of the four fitted parameters  $\alpha$ ,  $\nu$ ,  $\mu$ , and  $\tau$  (left to right) for MA, LA, NYC, and  
222 SJRP (top to bottom). See Table 3 in the Methods section for an explanation of the parameters. The  
223 values are extracted every seven days from data provided by the respective regions. The parameters vary  
224 significantly over time and location. Flat points occur during the seven day windows where the  
225 parameters are held constant. The fitting procedure is also outlined in the Methods section.

226

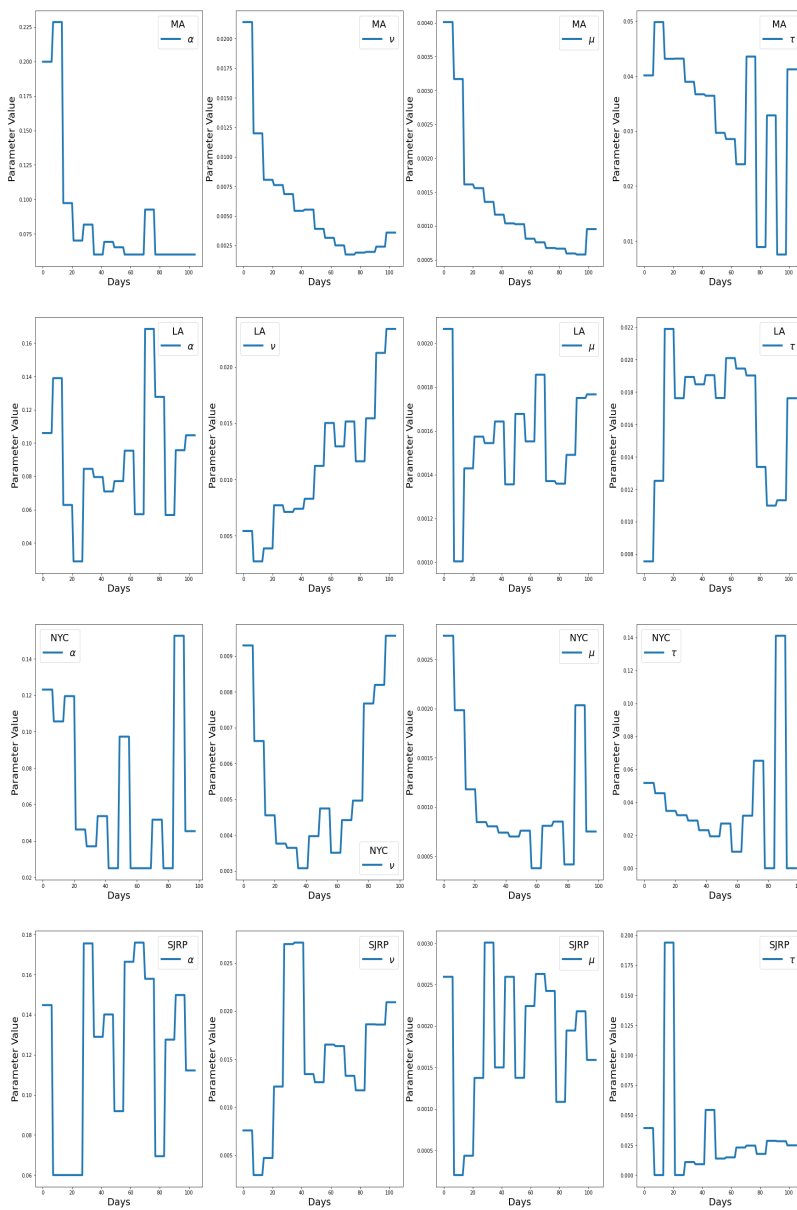

227

228 **Figure S6**

229 **Figure S6.** Time series of the three fitted pieces of data Cumulative Cases, Daily Hospitalized, and  
230 Cumulative Deaths (left to right) for each county receiving testing in CA; Ventura (2A), Stanislaus (2B),  
231 Santa Clara (2C), San Joaquin (2D), San Francisco (2E), San Diego (2F), San Bernardino (2G),  
232 Sacramento (2H), Orange (2I), Los Angeles (2J), Kern (2K), Fresno (2L), Alameda (2M). The counties  
233 included satisfy two requirements: population greater than 1.5% of the total CA population and nonzero  
234 total number of deaths at each point in time. The fitting procedure is outlined in the Methods section.

235

236 **A**

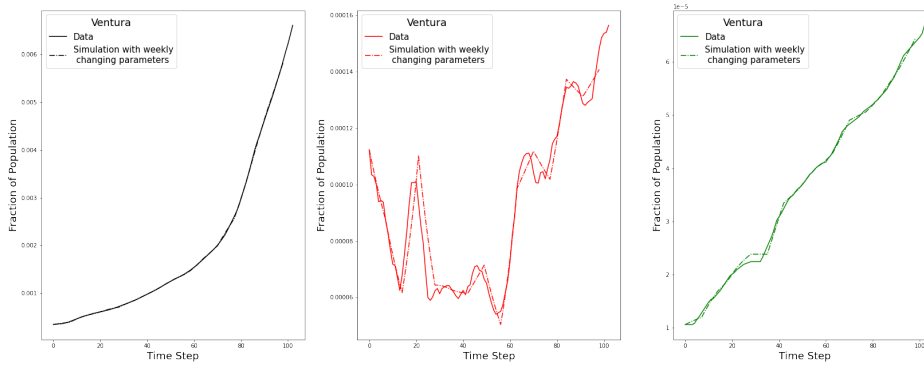

237

238 **B**

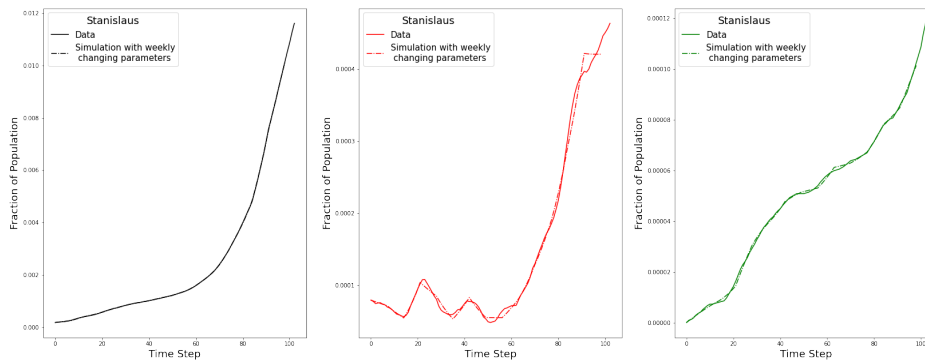

239

240

241

242 C

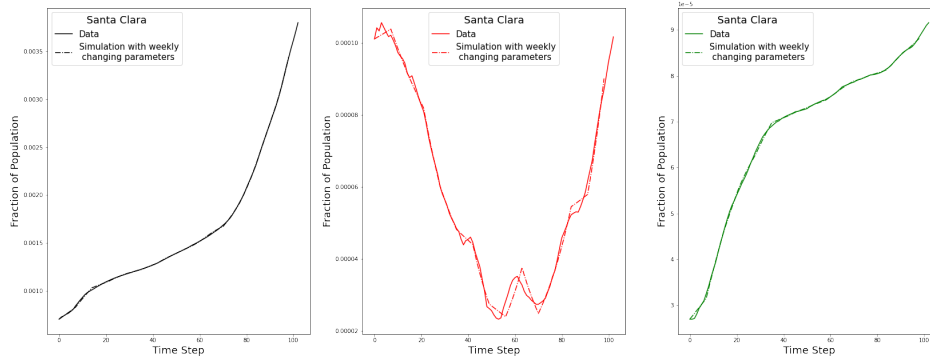

243

244 D

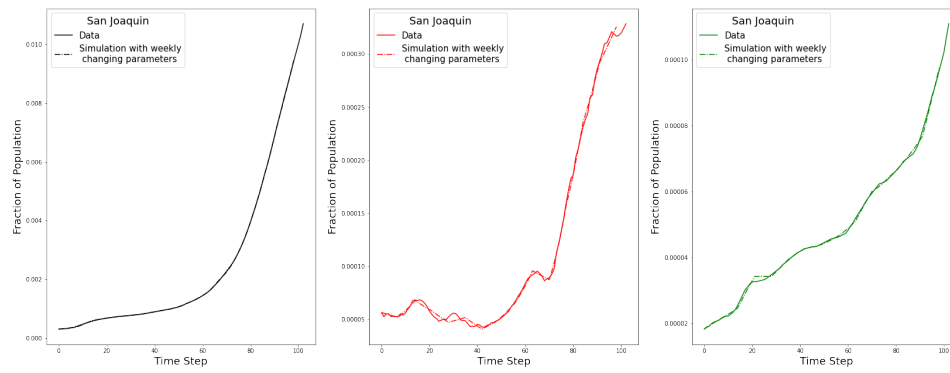

245

246 E

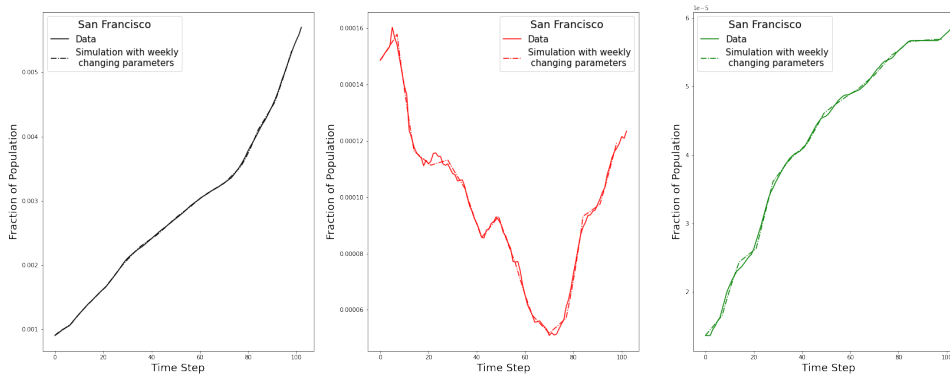

247

248

249 **F**

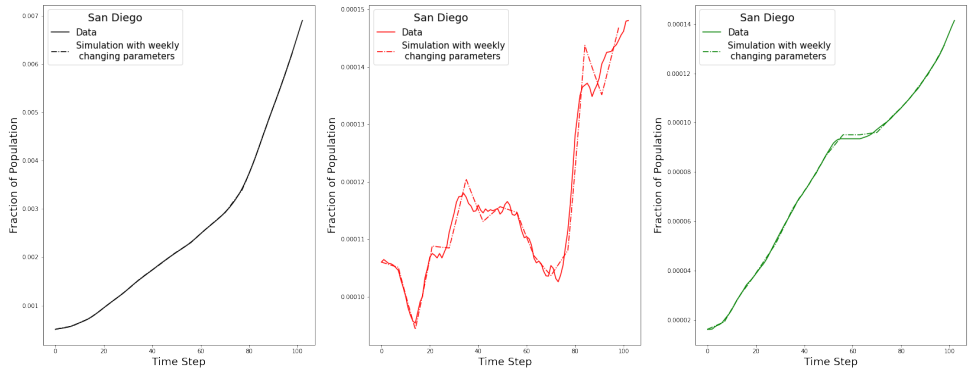

250

251 **G**

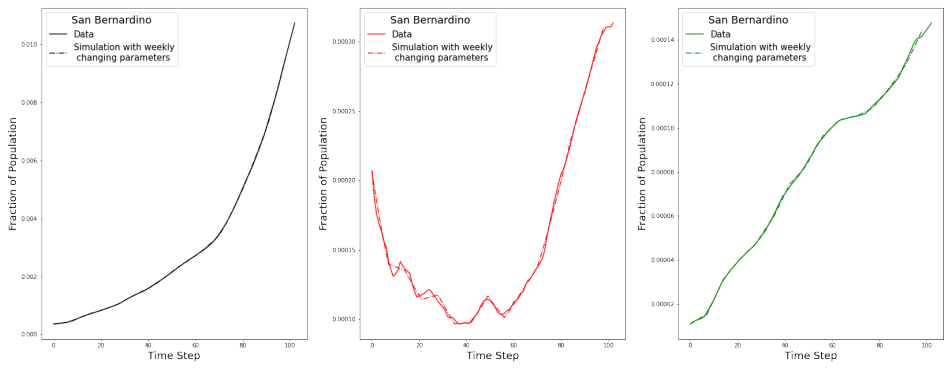

252

253 **H**

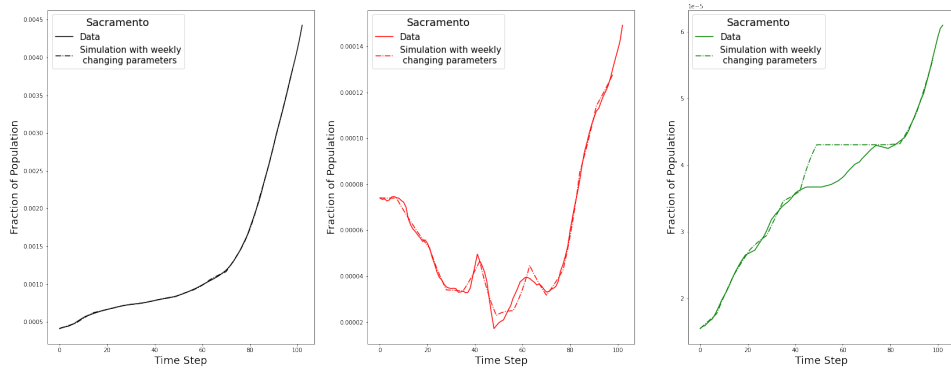

254

255

256 I

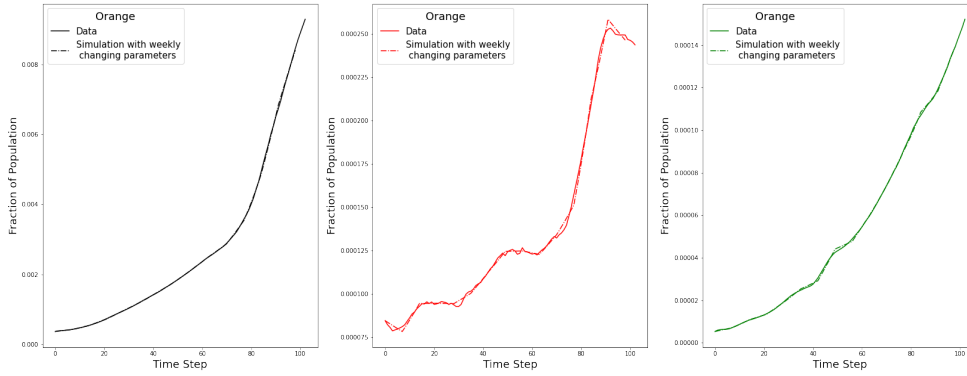

257

258 J

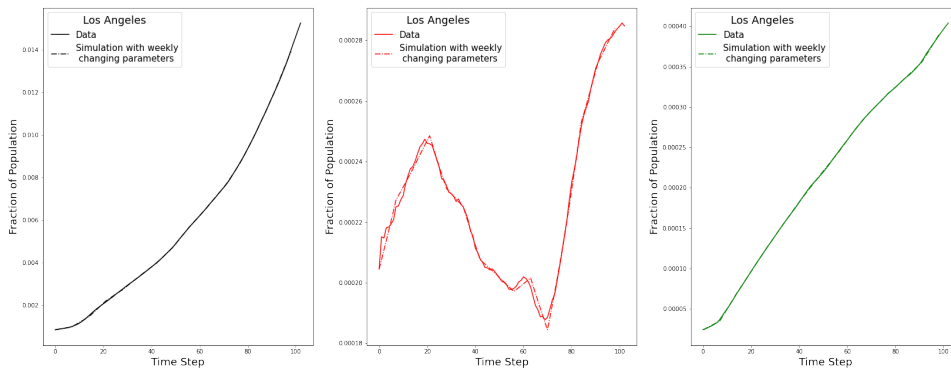

259

260 K

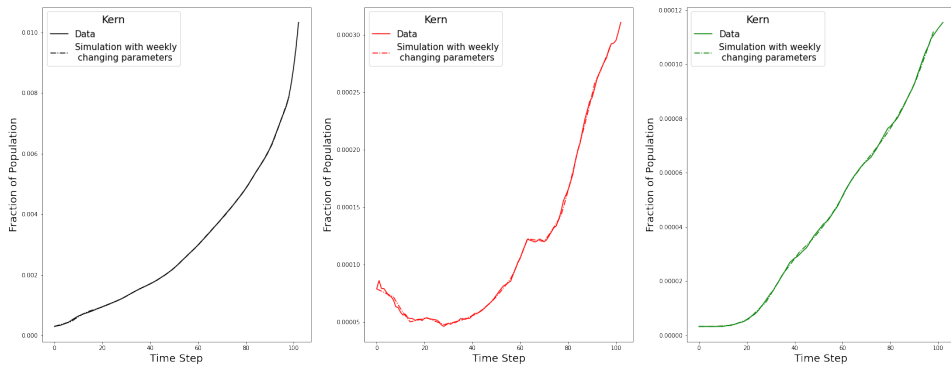

261

262

263 L

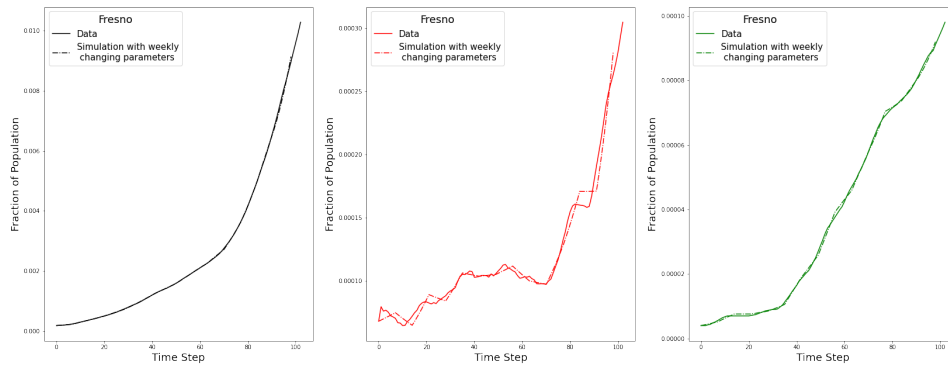

264

265 M

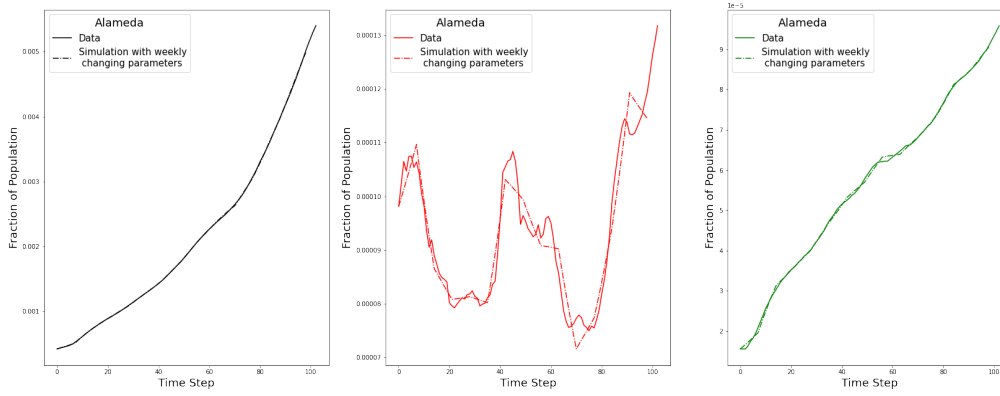

266
